# Supplementary material for: Risk Stratification and Clinical Characteristics of Patients with Late Recurrence of Melanoma (>10 Years)
Source: MDPI journal article supplement (doi:10.3390/jcm11072026), 2022-04-05
Supplement: s1 [file s1]

## Supplementary Materials

**Figure S1.** Immunohistochemical staining pigmented melanoma.

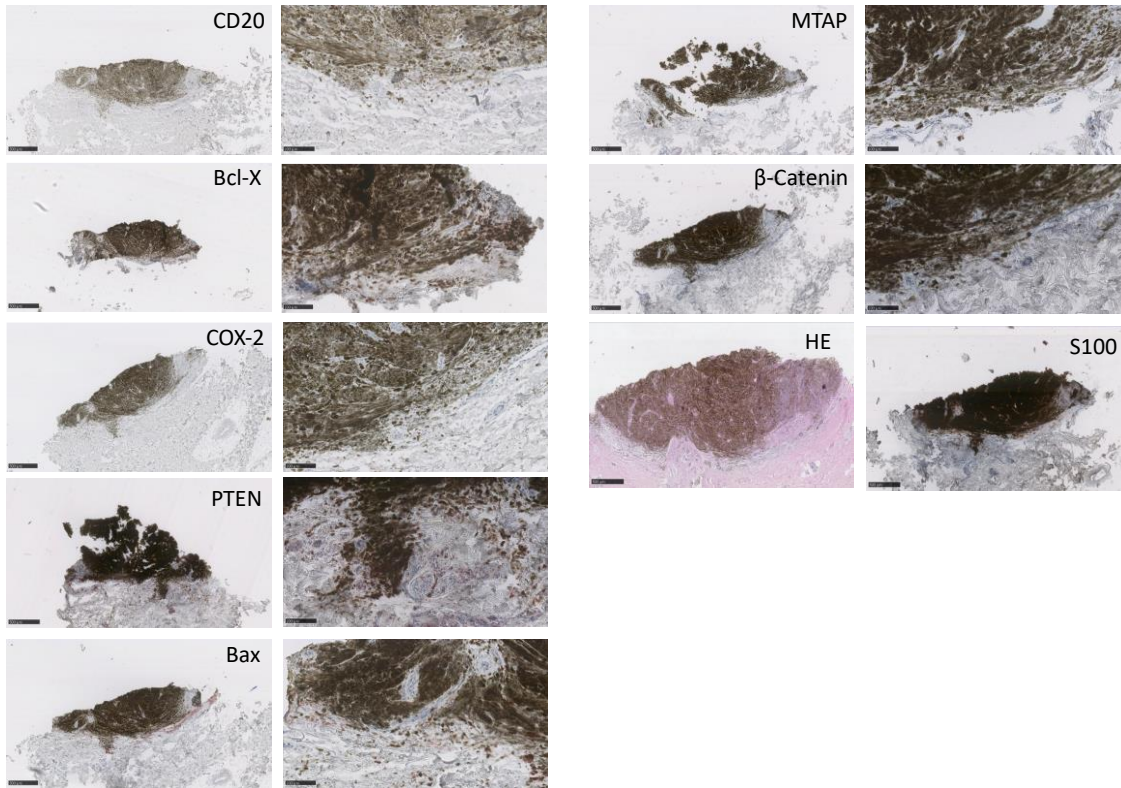

**Table S1.** Differential blood count of entire study collective, divided into normal, increased or decreased.

| Blood count at time of metastatic disease |           | Total      |            | Male      |            | Femal     |            |
|-------------------------------------------|-----------|------------|------------|-----------|------------|-----------|------------|
| <i>n</i> (%)                              |           | 18 (100%)  |            | 9 (50%)   |            | 9 (50%)   |            |
|                                           |           | absolut    | prozentual | absolut   | prozentual | absolut   | prozentual |
| Leucocytes [exp9/L]                       | Mean      | 8.3        | -          | 9.3       | -          | 7.4       | -          |
|                                           | Median    | 7.8        | -          | 8.3       | -          | 7.6       | -          |
|                                           | Decreased | 0          | -          | 0         | -          | 0         | -          |
|                                           | Normal    | 14 (77.8%) | -          | 6 (66.7%) | -          | 8 (88.9%) | -          |
| <i>n</i> (%)                              |           | Increased  | 4 (22.2%)  | 3 (33.3%) | -          | 1 (11.1%) | -          |
| Lymphocytes [exp9/L]                      | Mean      | 1.4        | 18.1%      | 1.6       | 19.60%     | 1.1       | 16.60%     |
|                                           | Median    | 1.3        | 16.90%     | 1.3       | 18.70%     | 1.2       | 16.20%     |
|                                           | Decreased | 4 (22.2%)  | 10 (55.6%) | 0         | 4 (44.4%)  | 4 (44.4%) | 6 (66.7%)  |
|                                           | Normal    | 14 (77.8%) | 8 (44.4%)  | 9 (100%)  | 5 (55.6%)  | 5 (55.6%) | 3 (33.3%)  |
| <i>n</i> (%)                              |           | Increased  | 0          | 0         | 0          | 0         | 0          |
| Eosinophil granulocytes [exp9/L]          | Mean      | 0.1        | 1.70%      | 0.2       | 2.00%      | 0.1       | 1.40%      |
|                                           | Median    | 0.1        | 1.20%      | 0.1       | 1.20%      | 0.1       | 1.10%      |
|                                           | Decreased | -          | -          | -         | -          | -         | -          |
|                                           | Normal    | 18 (100%)  | 17 (94.4%) | 9 (100%)  | 8 (88.9%)  | 9 (100%)  | 9 (100%)   |
| <i>n</i> (%)                              |           | Increased  | 0          | 1 (5.6%)  | 0          | 1 (11.1%) | 0          |
| Neutrophil granulocytes [exp9/L]          | Mean      | 6.1        | 71.30%     | 6.7       | 68.80%     | 5.6       | 73.60%     |
|                                           | Median    | 5.7        | 72.30%     | 6         | 68.70%     | 5.6       | 74.70%     |
|                                           | Decreased | 0          | 0          | 0         | 0          | 0         | 0          |
|                                           | Normal    | 12 (66.7%) | 13 (72.2%) | 5 (55.6%) | 8 (88.9%)  | 7 (77.8%) | 5 (55.6%)  |
| <i>n</i> (%)                              |           | Increased  | 6 (33.3%)  | 5 (27.8%) | 4 (44.4%)  | 2 (22.2%) | 4 (44.4%)  |
| Thrombocytes [exp9/L]                     | Mean      | 274.9      | -          | 286       | -          | 263.8     | -          |
|                                           | Median    | 280.5      | -          | 281       | -          | 276       | -          |
|                                           | Decreased | 1 (5.6%)   | -          | 0         | -          | 1 (11.1%) | -          |
|                                           | Normal    | 15 (83.3%) | -          | 8 (88.9%) | -          | 7 (77.8%) | -          |
| <i>n</i> (%)                              |           | Increased  | 2 (11.1%)  | 1 (11.1%) | -          | 1 (11.1%) | -          |

**Table S2.** Comparison ultra-late recurrence of melanoma (>15 years between primary melanoma and metastasis) and late recurrence melanoma (10-15 years between primary melanoma and metastasis).

|                                                       | Late Recurrence Melanoma<br>(10–15 years) | Ultra-Late Recurrence Melanoma<br>(>15 years) |
|-------------------------------------------------------|-------------------------------------------|-----------------------------------------------|
| <i>n</i>                                              | 24                                        | 12                                            |
| Male <i>n</i> (%)                                     | 10 (41.7%)                                | 8 (66.7%)                                     |
| Age at diagnosis [years] (Median)                     | 51.9 (50.6)                               | 50.3 (50.7)                                   |
| Age at metastasis [years] (Median)                    | 63.6 (62.8)                               | 71.5 (72.6)                                   |
| Time period until metastatic disease [years] (Median) | 11.7 (11.7)                               | 21.2 (19.0)                                   |
| Breslow's depth [mm] (Median)                         | 1.7 (1.5)                                 | 1.9 (1.8)                                     |
| Localization of primary melanoma:                     |                                           |                                               |
| Head/Neck <i>n</i> (%)                                | 3 (12.5%)                                 | 2 (16.7%)                                     |
| Trunk <i>n</i> (%)                                    | 16 (66.7%)                                | 3 (25%)                                       |
| Upper extremity <i>n</i> (%)                          | 3 (12.5%)                                 | 2 (16.7%)                                     |
| Lower extremity <i>n</i> (%)                          | 2 (8.3%)                                  | 5 (41.7%)                                     |
| S100 at time of metastatic disease, [ng/mL] (Median)  | 0.76 (0.07)                               | 0.42 (0.11)                                   |
| LDH at time of metastatic disease, [μkat/L] (Median)  | 5.8 (4.3)                                 | 5.6 (5.9)                                     |
